# Supplementary material
Source: Springer Nature journal article supplement (https://www.springermedizin.de/resource/supplementary/12889_2012_5043_MOESM2_ESM.pdf/9494530)

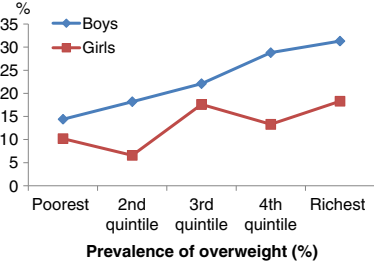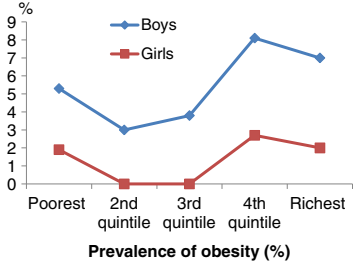

Supplement: MOESM2 [file 9494530]
